# Supplementary material for: Efficient suilysin-mediated invasion and apoptosis in porcine respiratory epithelial cells after streptococcal infection under air-liquid interface conditions
Source: PubMed Central journal article supplement (PMC4882623; doi:10.1038/srep26748), 2016-05-27
Supplement: srep26748-s1.pdf [file srep26748-s1.pdf]

**Efficient suilysin-mediated invasion and apoptosis in porcine respiratory epithelial cells after streptococcal infection under air-liquid interface conditions**

Fandan Meng, Nai-Huei Wu, Maren Seitz, Georg Herrler, Peter Valentin-Weigand

- Supplementary Information -

**Figure S1**

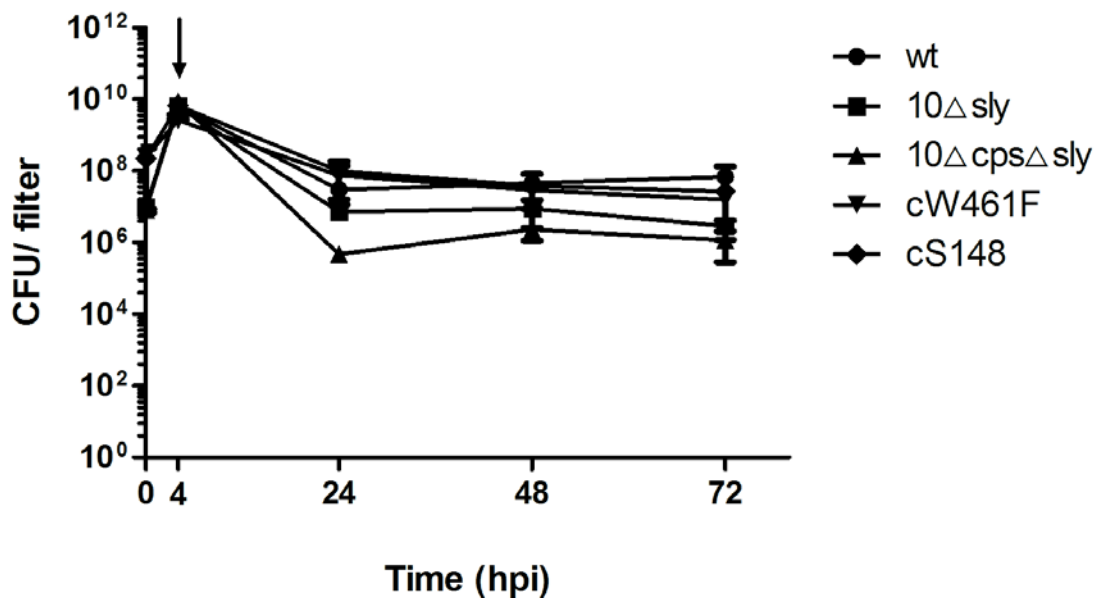

**Colonization of *S. suis* on the apical side of well-differentiated porcine bronchial epithelial cells.**

Growth kinetics of streptococci determined by counting of colony forming units (CFU) after replica plating on blood agar plates on the apical side of infected PBEC maintained under air-liquid interface conditions. PBEC were apically infected with approximately  $1 \times 10^7$  CFU of the *S. suis* wt strain,  $10\Delta sly$ ,  $10\Delta cps\Delta sly$ , cW461F or

cS148 respectively, and cells were washed thoroughly after 4 hours (indicated by arrowhead) to remove non-adherent bacteria. Cells were further incubated until 72 hpi under air-liquid interface conditions.

**Figure S2**

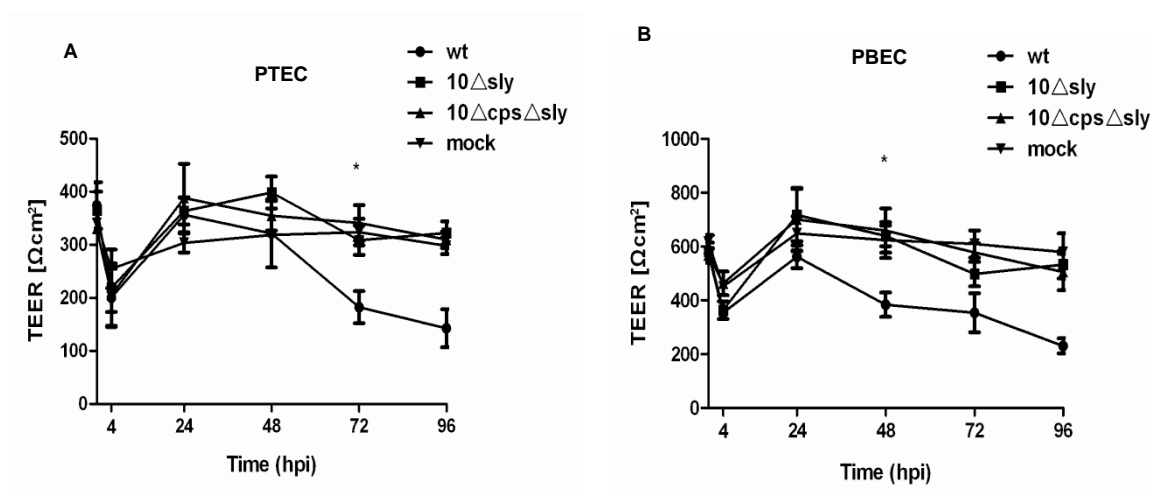

**TEER measurement of *S. suis*-infected differentiated porcine airway epithelial cells (PTEC and PBEC)**

PTEC and PBEC were apically infected with approximately  $1 \times 10^7$  CFU of *S. suis* wt strain, 10 $\Delta$ sly, or 10 $\Delta$ cps $\Delta$ sly, respectively. After 4 h, cells were washed thoroughly to remove non-adherent bacteria, and further incubated until 96 hpi under air-liquid interface conditions. TEER of mock-infected and *S. suis*-infected PTEC (A) or PBEC (B) was determined at the indicated time points. Results are expressed as means  $\pm$  SEM and significance indicated by \* ( $P < 0.05$ ) was determined using one-way-ANOVA and Tukey multiple comparison test.
